1 **Title:**

2 Synaptophysin is a  $\beta$ -Amyloid Target that Regulates Synaptic Plasticity and Seizure  
3 Susceptibility in an Alzheimer's Model

4

5 **Authors:**

6 Daniel J. Adams<sup>1</sup>, Chong Shen<sup>1</sup>, Josien Levenga<sup>3</sup>, Tamara Basta<sup>1</sup>, Stephen P. Eisenberg<sup>1</sup>, James  
7 Mapes<sup>1</sup>, Lucas Hampton<sup>1</sup>, Kelly Grounds<sup>1</sup>, Charles A. Hoeffler<sup>3</sup>, and Michael H. B. Stowell<sup>1, 2\*</sup>

8 <sup>1</sup>Department of MCD Biology, University of Colorado, Boulder, CO 80309

9 <sup>2</sup>Department of Mechanical Engineering, University of Colorado, Boulder, CO 80309

10 <sup>3</sup>Institute for Behavioral Genetics, University of Colorado, Boulder, CO 80309

11

12 **Intro/abstract:**

13 Alzheimer's disease (AD), a condition characterized by cognitive deficits and progressive loss of  
14 memory, is causally linked to the short amyloid peptide A $\beta$ 42, which disrupts normal  
15 neurotransmission<sup>1,2</sup>. Neurotransmitter (NT) release from synaptic vesicles (SV) requires  
16 coordinated binding of the conserved core secretory machinery comprised of the soluble NSF  
17 attachment protein receptor (vSNARE) synaptobrevin 2 (VAMP2) on the SV and the cognate  
18 tSNAREs on the plasma membrane. Synaptophysin (SYP) is the most abundant SV protein<sup>3</sup> and  
19 the major pre-fusion binding partner of VAMP2<sup>4</sup>. A major challenge in understanding the  
20 etiology and prevention of AD is determining the proteins directly targeted by A $\beta$ 42 and  
21 elucidating if these targets mediate disease phenotypes. Here we demonstrate that A $\beta$ 42 binds to  
22 SYP with picomolar affinity and disrupts the SYP/VAMP2 complex resulting in inhibition of  
23 both neurotransmitter release and synaptic plasticity. While functionally redundant paralogs of  
24 SYP have masked its critical activity in knockout studies<sup>5,6</sup>, we now demonstrate a profound  
25 seizure susceptibility phenotype in SYP knockout mice that is recapitulated in an AD model  
26 mouse. Our studies imply a subtle yet critical role for SYP in the synaptic vesicle cycle and the  
27 etiology of AD.

28

## 29 **Results:**

30 Soluble A $\beta$ 42 oligomers are the primary toxic species driving AD<sup>12</sup>, and mammalian synapses  
31 exposed to A $\beta$ 42 have slower kinetics of evoked synaptic release<sup>13,14</sup>. We hypothesized that this  
32 phenomenon is mediated by the major synaptic vesicle protein SYP, as it is reported to form a  
33 large multimeric complex with the essential vSNARE VAMP2 and potentially modulates  
34 synaptic vesicle fusion<sup>14-16</sup>. To investigate a role for SYP in A $\beta$ 42-disruption of SV release, we  
35 first developed a standardized method to reliably produce A $\beta$ 42 peptide that remained  
36 predominantly as monomers, dimers and soluble oligomers (Extended Data Fig. 1). This ensured  
37 consistent use of the disease-relevant form, as A $\beta$ 42 neurotoxicity and neuromodulatory  
38 activities are critically sensitive to its aggregation state<sup>12,17</sup>. Cultured cortical neurons from WT  
39 and *Syp*<sup>-/-</sup> mice were then treated with 15 nM A $\beta$ 42 or scrambled control peptide, and the evoked  
40 release kinetics of the readily releasable pool (RRP) of SVs were quantified using FM dye  
41 destaining<sup>18</sup>. We implemented single synapse kinetic analysis in order to determine the  
42 unloading kinetics at each of ~180,000 individual synapses and expose the distribution within  
43 each sample (Fig. 1a, b). As predicted by previous studies<sup>5,19</sup>, the kinetics of NT release were  
44 similar in WT and *Syp*<sup>-/-</sup> neurons (Fig. 1c blue and black curves) where synapses most frequently  
45 unloaded >60% of labeled SV within 45s. However, the presence of A $\beta$ 42 drastically reduced  
46 the overall release kinetics of WT synapses, roughly doubling the mode of the population to 85s  
47 (Fig. 1a). Additionally, the distribution of kinetics at WT synapses treated with A $\beta$ 42 was  
48 significantly broader (kurtosis=0.49) than in control-treated WT synapses (kurtosis=4.96),  
49 indicating that effects of the peptide at this physiologic concentration are heterogeneous across  
50 synapses. Furthermore, while a small number of these synapses retained normal fast kinetics, we  
51 also observed a population of synapses with very slow kinetics ( $\tau$ >400s) in the A $\beta$ 42 treatment  
52 group in which exocytosis appeared completely halted, as the decay rates were similar to that of  
53 background photobleaching (Extended Data Fig. 2). Remarkably, this dramatic shift in kinetics  
54 was completely absent in *Syp*<sup>-/-</sup> neurons treated with A $\beta$ 42 (Fig. 1b), indicating that SYP is  
55 necessary for A $\beta$ 42-induced impairment of vesicle release.

56 While FM-dye methodology allowed simultaneous interrogation of a large number of synapses  
57 under limited A $\beta$ 42 dosing and observation of a comprehensive spectrum of SV release  
58 derangements, this approach employed non-physiologic exhaustive stimulation to achieve  
59 complete RRP release. To substantiate our findings with a more endogenous form of stimulation,  
60 we measured evoked excitatory postsynaptic currents (eEPSCs) in cultured neurons incubated  
61 with A $\beta$ 42 or scrambled peptide. To ensure that patched cells received adequate treatment, we  
62 saturated the culture with the commonly used dose of 500 nM peptide. Treatment with A $\beta$ 42  
63 significantly reduced WT eEPSC amplitude, but had little effect on *Syp*<sup>-/-</sup> neurons (Fig. 1d-g). To  
64 determine whether the attenuated evoked response arose from reduced release probability, we  
65 also measured miniature excitatory postsynaptic potentials (mEPSP) under the similar conditions  
66 (Fig. 1h-j). While A $\beta$ 42 treatment did not alter spontaneous release amplitude in WT or *Syp*<sup>-/-</sup>  
67 neurons, we observed a 56% decrease in mEPSP frequency in WT but not *Syp*<sup>-/-</sup> cells,

68 demonstrating that A $\beta$ 42 reduces probability of evoked and spontaneous SV release by a SYP-  
69 dependent mechanism.

70 To explore the possibility that A $\beta$ 42 disrupts SV release via direct SYP-A $\beta$ 42 binding, we  
71 performed surface plasmon resonance (SPR) with A $\beta$ 42 or control peptides immobilized as the  
72 ligand and assayed binding of purified recombinant human SYP protein as analyte. Using  
73 antibodies that selectively bind different A $\beta$ 42 aggregation states<sup>20</sup>, we determined that the  
74 immobilized peptide was primarily the disease-relevant monomers, dimers and soluble oligomers  
75 rather than higher order aggregates (Extended Data fig. 3)<sup>12</sup>. We observed a remarkably high  
76 affinity interaction with an apparent  $K_d=750$  pM for the native SYP hexamer and no observable  
77 binding to immobilized control reverse (42-1) peptide (Fig. 2a). As both species were highly  
78 purified, this result indicates that the SYP-A $\beta$ 42 interaction is direct and can occur in the absence  
79 of other proteins or cofactors. Given that the estimated concentration of soluble A $\beta$ 42 in brain  
80 tissue of AD patients is in the low nanomolar range<sup>21</sup>, we suggest that A $\beta$ 42 may bind to SYP in  
81 neurons of AD patients to reduce release probability at physiological concentrations.

82 Structural features of the SYP/VAMP2 complex suggest that the SYP hexamer enhances the rate  
83 of SV fusion by clustering VAMP2 dimers on the SV surface, conferring cooperativity of trans-  
84 SNARE interactions<sup>15,22</sup>. We posited that a high affinity A $\beta$ 42-SYP interaction could disrupt this  
85 scaffold function by interrupting SYP/VAMP2 binding. In support of this model, we found that  
86 A $\beta$ 42 treatment of cultured neurons reduced intact SYP/VAMP2 complexes by ~50% (Fig. 2b,  
87 c). The VAMP2 trans-membrane domain (TMD) is necessary for SYP binding<sup>4</sup> and  
88 manipulations of this TMD also impair vesicle fusion in many model systems<sup>23-25</sup>, consistent  
89 with our data suggesting that association with SYP is required for normal release kinetics.  
90 Paradoxically, loss of SYP clustering in *Syp*<sup>-/-</sup> neurons appears to have no effect on SV  
91 exocytosis<sup>26,27</sup> (Fig. 1b, f-j), and we hypothesized that related members of the physin protein  
92 family may functionally compensate for this loss. The six known neuronal paralogs of SYP  
93 feature unusually high conservation across the TMDs (Extended Data Fig. 4a, b) such that these  
94 related proteins may bind VAMP2 in the SV membrane and perform the clustering function  
95 when SYP is not present. Both synaptoporin (SYNPR) and synaptogyrin 1 (SYNGR1) can  
96 compensate for loss of SYP as shown using double knockout mice<sup>5,6</sup>, and we found that both  
97 paralogs were significantly upregulated in *Syp*<sup>-/-</sup> brains (Fig. 2d) consistent with the need to  
98 replace the ~30 copies of SYP in each SV<sup>3</sup>. Furthermore, we found that both proteins were  
99 bound to VAMP2 in *Syp*<sup>-/-</sup> animals by co-immunoprecipitation (Fig. 2e). However, the lack of  
100 sensitivity to A $\beta$ 42 observed in *Syp*<sup>-/-</sup> neurons suggests that A $\beta$ 42 does not target the SYP  
101 paralogs and disrupt binding to VAMP2 as it does with SYP. In support of this, A $\beta$ 42 affinity  
102 chromatography showed high selectivity of the peptide for SYP over SYNPR or SYNGR1 (Fig.  
103 2f). Additionally, VAMP2 did not co-purify with SYP on the A $\beta$ 42 beads suggesting that A $\beta$ 42  
104 and VAMP2 competitively bind SYP and that A $\beta$ 42 can displace bound VAMP2 via its high  
105 affinity interaction with SYP to disrupt its function in vesicle release. In addition to the essential  
106 SNARE proteins, a suite of accessory proteins are critically important in activating VAMP2-

107 mediated fusion<sup>7</sup>, and these data suggest that SYP also contributes substantially to this process in  
108 a similar role.

109 Acute A $\beta$ 42 treatment of hippocampal slices causes synaptic depression and impairment of LTP,  
110 and administration of peptide directly to the brain by microinjection generates short term  
111 memory deficits in rats<sup>12</sup>. To determine if such effects on plasticity could also be SYP-  
112 dependent, field excitatory postsynaptic potentials (fEPSPs) were measured in hippocampal  
113 slices from WT and *Syp*<sup>-/-</sup> mice in the presence and absence of A $\beta$ 42. Basal synaptic efficacy in  
114 *Syp*<sup>-/-</sup> slices was indistinguishable from WT (Extended Data Fig. 5), indicating that there is not a  
115 baseline difference in synaptic release probability. However, we found that while A $\beta$ 42 strongly  
116 inhibited LTP in WT slices, LTP was not significantly affected by A $\beta$ 42 in *Syp*<sup>-/-</sup> slices (Fig. 3a-  
117 d). This implies that the release defects attributed to loss of SYP/VAMP2 function in cultured  
118 neurons (Fig. 1) generate clinically relevant changes in circuit level physiology as well. Failure  
119 to form LTP is thought to underlie the cognitive deficits that are hallmarks of early AD<sup>29,30</sup>,  
120 implicating loss of SYP activity as an important early event in the disease progression and  
121 suggesting that SYP/VAMP2 may be a novel therapeutic target in this unsolved clinical  
122 challenge.

123 In addition to cognitive and memory phenotypes in AD, co-morbidity of seizures is well-  
124 documented<sup>31-33</sup>, and we hypothesized that aberrant synaptic release resultant from SYP/VAMP2  
125 disruption may contribute to this pathology. Transgenic AD (Tg-AD) model mice overproducing  
126 A $\beta$ 42 (Extended Data Fig. 6) recapitulated this clinical feature of the disease, displaying  
127 markedly increased susceptibility to kainic acid-induced seizures (Fig. 3e, f). We found that *Syp*<sup>-/-</sup>  
128 mice were also highly sensitized to seizures with nearly all of *Syp*<sup>-/-</sup> and Tg-AD mice  
129 experiencing clonus followed by death, while no WT animals experienced such seizure severity.  
130 Importantly, this is the first observation of a dramatic phenotype in the *Syp*<sup>-/-</sup> mice and  
131 substantiates the role of SYP in synaptic function, at least minimally at the circuit level.

132 Together, our results inform a model in which A $\beta$ 42 directly binds SYP in the SV membrane,  
133 displacing VAMP2 dimers, thereby compromising the catalytic function of pre-fusion v-SNARE  
134 clustering. When SYP is absent, SYP paralogs are upregulated and bind VAMP2 in its stead to  
135 perform this important role in vesicle fusion. A $\beta$ 42 does not bind these paralogs and therefore  
136 cannot perturb release probability or LTP on the *Syp*<sup>-/-</sup> background. The newly discovered  
137 seizure susceptibility phenotype we observe for *Syp*<sup>-/-</sup> mice suggests at minimus that loss of SYP  
138 and subsequent synaptic and circuit level perturbations are an early event in AD.

139 **Methods:**

140 **Animals:** All animal procedures were carried out in accordance with protocols approved by the  
141 IACUC at CU Boulder and the Animal Welfare Assurance filed with OLAW. C57BL/6J (B6)  
142 mice (Jackson Labs) were used as WT in all experiments. *Syp*<sup>-/-</sup> animals<sup>34</sup> were a gift of R. Leube  
143 at RWTH Aachen University. The TgAD mice (B6C3-Tg(APP<sup>swe</sup>,PSEN1De9)) were obtained  
144 from Jackson Labs.

145 **Cell Culture:** Cortical neurons were prepared as described previously<sup>35</sup> and plated at high  
146 density (~5000 cells/mm<sup>2</sup>) to ensure physiologically relevant synaptic connections.

147 **Aβ42 peptide preparation:** Amyloid peptides were prepared by dissolving a lyophilized film of  
148 the peptide at 1mg/ml in 10mM NaOH, followed by bath sonication for 5 minutes and  
149 centrifugation at 13,000g for 5 minutes. The concentration was then determined using a  
150 Nanodrop at 280 nm and cross-validated using both a BCA assay and SDS-PAGE. Aβ42  
151 samples were further analyzed by native SDS-PAGE and negative stain EM to characterize the  
152 oligomeric nature of the amyloid prior to use. All samples were analyzed or utilized within 1  
153 hour of preparation.

154 **FM 1-43 Assays:** Imaging was performed on primary cortical neurons prepared as above at 12 -  
155 15 DIV. Neurons were treated with 10 to 15 nM Aβ42 or scrambled peptide (R Peptide, Bogart,  
156 Georgia or AmideBio, Boulder, Colorado) 24 hours prior to imaging. Cells were treated within 1  
157 hour of sample peptide preparation by removal of 1ml of conditioned media, addition of peptide  
158 to the conditioned media and then replacement of the mixture to the culture dish. Neurons were  
159 labeled with 10 μM FM 1-43 (Invitrogen, Carlsbad, California) in stimulating buffer (25 mM  
160 HEPES pH 7.4, 59 mM NaCl, 70 mM KCl, 2 mM CaCl<sub>2</sub>, 1 mM MgCl<sub>2</sub>, 30 mM glucose) for 2  
161 minutes at 37 °C followed by washing in rest buffer (25 mM HEPES pH 7.4, 124 mM NaCl, 5  
162 mM KCl, 0.2 mM CaCl<sub>2</sub>, 5 mM MgCl<sub>2</sub>, 30 mM glucose) to prevent release of labeled vesicles  
163 prior to assay. Cultures were depolarized under perfusion with stimulating buffer and imaged for  
164 60 seconds after onset of release. For all experiments synaptic puncta were identified in ImageJ<sup>36</sup>  
165 by making a max projection of the video, background subtraction of 0.5\*mean pixel intensity  
166 and finding local maxima on a 10 px (~650 nm) radius with the NEMO-derived<sup>37</sup> ImageJ plugin  
167 3D Fast Filter. These maps were enlarged over a 5 px radius and mean grey value of each  
168 punctum was plotted against time. Each unloading curve was fitted to an exponential decay  
169 equation of the form  $f(t) = f_0 \cdot e^{(-1/\tau)t} + c$  to determine a time constant,  $\tau$ , to represent the kinetics  
170 of release at each synapse. These data were filtered for particles whose behavior poorly fit the  
171 exponential model ( $R^2 < 0.95$ ) and the data selected for values of between 0 and 500 seconds,  
172 although a small number of extremely slow decay events >500 seconds, were observed. The  
173 included  $\tau$  values were sorted into 5 second bins and displayed as a histogram. Each bin  
174 represents the aggregate probability density from all biological replicates at each  $\tau$  value.

175 **Single cell recordings:** Cultured cortical neurons prepared as above. Evoked synaptic  
176 transmission was triggered by one millisecond current injections using a concentric bipolar  
177 microelectrode (FHC; Model: CBAEC75) placed about 100-150 μm from the cell bodies of  
178 patched neurons. The extracellular stimuli were manipulated using an Isolated Pulse Stimulator  
179 (World Precision Instruments). Cells were held at -70V for all experiments. The evoked  
180 responses were measured by whole-cell recordings using a Multiclamp 700B amplifier  
181 (Molecular Devices). The whole-cell pipette solution contained 135 mM CsCl, 10 mM HEPES-

182 CsOH (pH 7.25), 0.5 mM EGTA, 2 mM MgCl<sub>2</sub>, 0.4 mM NaCl-GTP, and 4 mM NaCl-ATP. The  
183 bath solution contained 140 mM NaCl, 5 mM KCl, 2 mM CaCl<sub>2</sub>, 0.8 MgCl<sub>2</sub>, 10 mM HEPES-  
184 NaOH (pH 7.4), and 10 mM Glucose. For A $\beta$ 42 treatment peptide was prepared as described  
185 above. Neurons were treated with 500 nM A $\beta$ 42 24 hours prior to recording, and 500 nM A $\beta$ 42  
186 was also added in bath solution during recording. EPSCs were distinguished by including 50  
187  $\mu$ M picrotoxin (Sigma) in the bath solution. The mEPSCs were sampled at 10 kHz in the  
188 presence of 1  $\mu$ M tetrodotoxin (TTX, Sigma). The resistance of pipettes was 3-5 M $\Omega$ . The series  
189 resistance was adjusted to 8-10 M $\Omega$  once the whole-cell configuration was established.

190 **Antibodies:** Antibodies were obtained from Synaptic Systems, Goettingen, Germany (SYP,  
191 VAMP2, MAP2), Santa Cruz Biotechnology, Santa Cruz, California (synaptoporin,  
192 synaptogyrin1), and Pierce (synaptogyrin1), Covance Research Products, Inc. (A $\beta$ 42, 4G8 and  
193 6E10) and Novus Biologicals (A $\beta$ 42, NB300-226).

194 **Human SYP expression and purification.** Full length 6xHis tagged human SYP was expressed  
195 using modified methods previously described for rat synaptophysin<sup>38</sup>. Isolated SF9 cells were  
196 solubilized with 1% Fos-choline 14 (FC14) and purified using a two-step chromatography  
197 employing a Ni-NTA column followed by a Sephadex S200 size exclusion column where human  
198 SYP eluted with an apparent molecule weight of ~240kD corresponding to a hexamer. The  
199 samples were maintained in 0.15M sodium chloride, 0.03M sodium HEPES, pH 7.4, 0.009%  
200 FC14 at 4°C.

201 **Surface Plasmon Resonance:** Binding studies were performed on a Biacore 3000 or a BiOptix  
202 404pi, with similar results. For the Biacore, a CM5 chip was used and for the BiOptix  
203 instrument, a CMV150 chip was employed. BioPure™ recombinant A $\beta$ 42, scrambled A $\beta$ 42, or  
204 A $\beta$ 42-1 (AmideBio, Boulder, CO) was dissolved to 0.1mM in 10mM NaOH, and diluted to 1 $\mu$ M  
205 in 10mM NaOAc pH 4.0 immediately prior to immobilization using EDC-NHS chemistry.  
206 Indicated concentrations of recombinant human SYP, containing a His(6)-tag was used as  
207 analyte. Bovine serum albumin (Sigma) was used as a control protein. Binding at a flow rate of  
208 20 $\mu$ l/min was in 0.15M sodium chloride, 0.03M sodium HEPES, pH 7.4, 0.009% Fos-choline 14  
209 for all samples.

210 **Immunoprecipitation:** Neurons were gently scraped from the dish in PBS and pelleted at 200 x  
211 g, then lysed in lysis buffer (320 mM sucrose, 10 mM HEPES pH 7.4, 1 mM EGTA, 100  $\mu$ M  
212 EDTA, 0.1% (v/v) triton X-100) supplemented with protease inhibitor cocktail (Roche) rocking  
213 for 1 hr at 4 °C. Five  $\mu$ g of precipitating antibody was bound to PureProteome protein A  
214 magnetic beads (Millipore, Billerica, Massachusetts) in IP buffer (25 mM HEPES pH 7.4, 150  
215 mM NaCl, 10 mM MgCl<sub>2</sub>, 1 mM EDTA, 1% glycerol, 0.5% NP-40) for 10 minutes and the  
216 beads were washed. Neuron lysates were applied in IP buffer with protease inhibitor cocktail  
217 (Roche) overnight at 4 °C. Beads were washed thrice in IP buffer and bound material was eluted  
218 at 95 °C in 2X SDS sample buffer.

219 **Densitometry:** Immunoblot results were quantified with ImageJ<sup>36</sup>. Levels of co-precipitated  
220 protein were normalized to levels of recovered bait protein and shown as a ratio over samples  
221 treated with scrambled A $\beta$ 42 (Fig. 2c), or normalized to MAP2 band and shown as ratio over  
222 WT protein levels (Fig. 2d).

223 **Alignments:** Human sequences of SYP and homologs were obtained from the Uniprot database  
224 (uniprot.org). Paralog tree was produced with the simple analysis tool from phylogeny.fr.

225 ClustalW alignment was performed with gap penalties 12 open and 1 extension and aligned with  
226 PSI-BLAST at 3 iterations and an E-value cutoff of 0.01. This alignment was assigned a  
227 similarity score at each position by the PRALINE server using the BLOSUM62 matrix. The  
228 conservation scores were presented at each position as a moving average over a 3 residue  
229 window to smooth the plot. The query sequence (SYP) was then analyzed for hydropathy using  
230 the ExPASy ProtScale tool with the Kyte & Doolittle algorithm at a window size of 19 residues.

231 **Synaptosome preparation:** Whole brains were obtained from age-matched female B6 and *Syp*<sup>-/-</sup>  
232 adults. Brains were homogenized 13 strokes on ice in 4 mL of sucrose buffer (10 mM HEPES  
233 pH 7.4, 320 mM sucrose, 2 mM EGTA, 2mM EDTA) with protease inhibitor cocktail (Roche)  
234 and homogenates were cleared at 4 °C at 1000g for 10 minutes. Synaptosomes were pelleted at  
235 10,000g at 4 °C for 20 minutes, resuspended in buffer (25 mM HEPES pH 7.4, 150 mM NaCl,  
236 10 mM MgCl<sub>2</sub>, 1 mM EDTA, 1% glycerol) and total protein was quantified with the Pierce 660  
237 nM Protein Assay kit.

238 **Aβ42 affinity column:** AminoLink resin (Pierce, Rockford, Illinois) was functionalized  
239 according to manufacturer specifications with BioPure™ recombinant Aβ42 or scrambled Aβ42  
240 (AmideBio, Boulder, Colorado). Whole brain synaptosomes from B6 or *Syp*<sup>-/-</sup> mice were applied  
241 to column overnight at 4 °C in IP buffer (25 mM HEPES pH 7.4, 150 mM NaCl, 10 mM MgCl<sub>2</sub>,  
242 1 mM EDTA, 1% glycerol, 0.5% NP-40) with protease inhibitor cocktail (Roche). Beads were  
243 washed three times and bound material was eluted at 95°C in 2X SDS sample buffer.

244 **Purification of native SYP/VAMP2:** The native SYP/VAMP2 complex was purified from  
245 bovine brain tissue according to methods described previously<sup>22</sup>.

246 **Hippocampal slice preparation and electrophysiology:** Hippocampal slices (400 μm) were  
247 prepared from mice 2–4 months of age using a vibratome as described previously<sup>39</sup>. The slices  
248 were maintained at room temperature in a submersion chamber with artificial CSF (125 mM  
249 NaCl, 2.5 mM KCl, 2 mM CaCl<sub>2</sub>, 1 mM MgCl<sub>2</sub>, 1.25 mM NaH<sub>2</sub>PO<sub>4</sub>, 24 mM NaHCO<sub>3</sub>, and 15  
250 mM glucose) bubbled with 95% O<sub>2</sub>/5% CO<sub>2</sub>. Slices were incubated for at least 2 h before  
251 removal for experiments. For electrophysiology experiments, slices were transferred to recording  
252 chambers (preheated to 32°C) where they were superfused with oxygenated ACSF. Monophasic,  
253 constant-current stimuli (100 μs) were delivered with a bipolar silver electrode placed in the  
254 stratum radiatum of area CA3, and the field EPSPs (fEPSPs) were recorded in the stratum  
255 radiatum of area CA1 with electrodes filled with ACSF (resistance, 2–4 MΩ). Baseline fEPSPs  
256 were monitored by delivering stimuli at 0.033 Hz. fEPSPs were acquired, and amplitudes and  
257 maximum initial slopes measured, using pClamp 10 (Molecular Devices). LTP was induced with  
258 a high-frequency stimulation (HFS) protocol consisting of two 1s long 100 Hz trains, separated  
259 by 60 s, delivered at 70–80% of the intensity that evoked spiked fEPSPs<sup>40</sup>. Incubation of  
260 hippocampal slices with Aβ42 was performed in either recording chambers or maintenance  
261 chambers as needed. The final concentrations of Aβ42 stock was prepared in DMSO and stored  
262 at –20°C for at least 24 h before use at a final concentration of 500 nm.

263 **Aβ42 ELISA:** Human Aβ42 was quantitated using a sandwich ELISA kits using the  
264 manufacturer's protocol (Life Technologies). Briefly, whole brain extracts for each age group of  
265 both wild type (WT) and Tg-AD mice were analyzed and the level of Aβ42 was normalized to  
266 total protein as determined by BCA Assay.

267 **Pharmacological Seizure Susceptibility.** Mice of each genotype were assayed at 4-6 months of  
268 age. All mice were weighed the day of the experiment and were administered 25mg/kg kainic  
269 acid via i.p. from a freshly prepared 5mg/mL PBS solution. Mice were immediately placed in  
270 cylindrical observation chamber and monitored and scored in real time as well as constant video  
271 recording for 60 minutes. Both the observational and video recorded behavior were scored blind  
272 according to the modified Racine Scale.



273 **References:**

- 274 1. Koffie, R. M., Hyman, B. T. & Spires-Jones, T. L. Alzheimer's disease: synapses gone cold.  
275 *Mol. Neurodegener.* **6**, 63 (2011).
- 276 2. Selkoe, D. J. & Hardy, J. The amyloid hypothesis of Alzheimer's disease at 25 years. *EMBO*  
277 *Mol. Med.* **8**, 595–608 (2016).
- 278 3. Takamori, S. *et al.* Molecular Anatomy of a Trafficking Organelle. *Cell* **127**, 831–846  
279 (2006).
- 280 4. Edelman, L., Hanson, P. I., Chapman, E. R. & Jahn, R. Synaptobrevin binding to  
281 synaptophysin: a potential mechanism for controlling the exocytotic fusion machine. *EMBO*  
282 *J.* **14**, 224–231 (1995).
- 283 5. Janz, R. *et al.* Essential Roles in Synaptic Plasticity for Synaptogyrin I and Synaptophysin I.  
284 *Neuron* **24**, 687–700 (1999).
- 285 6. Spiwox-Becker, I. *et al.* Synaptic vesicle alterations in rod photoreceptors of synaptophysin-  
286 deficient mice. *Neuroscience* **107**, 127–142 (2001).
- 287 7. Südhof, T. C. Neurotransmitter release: the last millisecond in the life of a synaptic vesicle.  
288 *Neuron* **80**, 675–690 (2013).
- 289 8. Goate, A. *et al.* Segregation of a missense mutation in the amyloid precursor protein gene  
290 with familial Alzheimer's disease. *Nature* **349**, 704–706 (1991).
- 291 9. Sherrington, R. *et al.* Cloning of a gene bearing missense mutations in early-onset familial  
292 Alzheimer's disease. *Nature* **375**, 754–760 (1995).
- 293 10. Rogaev, E. I. *et al.* Familial Alzheimer's disease in kindreds with missense mutations in a  
294 gene on chromosome 1 related to the Alzheimer's disease type 3 gene. *Nature* **376**, 775–778  
295 (1995).
- 296 11. Corder, E. H. *et al.* Gene dose of apolipoprotein E type 4 allele and the risk of Alzheimer's  
297 disease in late onset families. *Science* **261**, 921–923 (1993).
- 298 12. Shankar, G. M. *et al.* Amyloid-beta protein dimers isolated directly from Alzheimer's brains  
299 impair synaptic plasticity and memory. *Nat. Med.* **14**, 837–842 (2008).
- 300 13. Parodi, J. *et al.* Beta-Amyloid Causes Depletion of Synaptic Vesicles Leading to  
301 Neurotransmission Failure. *J. Biol. Chem.* **285**, 2506–2514 (2009).
- 302 14. Russell, C. L. *et al.* Amyloid- $\beta$  Acts as a Regulator of Neurotransmitter Release Disrupting  
303 the Interaction between Synaptophysin and VAMP2. *PLoS ONE* **7**, e43201 (2012).
- 304 15. Adams, D. J., Arthur, C. P. & Stowell, M. H. B. Architecture of the  
305 Synaptophysin/Synaptobrevin Complex: Structural Evidence for an Entropic Clustering  
306 Function at the Synapse. *Sci. Rep.* **5**, 13659 (2015).
- 307 16. Lin, J. Y. *et al.* Optogenetic inhibition of synaptic release with chromophore-assisted light  
308 inactivation (CALI). *Neuron* **79**, 241–253 (2013).
- 309 17. State of aggregation. *Nat. Neurosci.* **14**, 399–399 (2011).
- 310 18. Gaffield, M. A. & Betz, W. J. Imaging synaptic vesicle exocytosis and endocytosis with FM  
311 dyes. *Nat. Protoc.* **1**, 2916–2921 (2007).
- 312 19. McMahon, H. T. *et al.* Synaptophysin, a major synaptic vesicle protein, is not essential for  
313 neurotransmitter release. *Proc. Natl. Acad. Sci. U. S. A.* **93**, 4760–4764 (1996).
- 314 20. Takahashi, R. H. *et al.* Oligomerization of Alzheimer's beta-amyloid within processes and  
315 synapses of cultured neurons and brain. *J. Neurosci. Off. J. Soc. Neurosci.* **24**, 3592–3599  
316 (2004).
- 317 21. Lue, L. F. *et al.* Soluble amyloid beta peptide concentration as a predictor of synaptic change  
318 in Alzheimer's disease. *Am. J. Pathol.* **155**, 853–862 (1999).

- 319 22. Arthur, C. P. & Stowell, M. H. B. Structure of Synaptophysin: A Hexameric MARVEL-  
320 Domain Channel Protein. *Structure* **15**, 707–714 (2007).
- 321 23. Dhara, M. *et al.* v-SNARE transmembrane domains function as catalysts for vesicle fusion.  
322 *eLife* **5**, (2016).
- 323 24. Chang, C.-W., Chiang, C.-W., Gaffaney, J. D., Chapman, E. R. & Jackson, M. B. Lipid-  
324 anchored Synaptobrevin Provides Little or No Support for Exocytosis or Liposome Fusion.  
325 *J. Biol. Chem.* **291**, 2848–2857 (2016).
- 326 25. Fdez, E., Martínez-Salvador, M., Beard, M., Woodman, P. & Hilfiker, S. Transmembrane-  
327 domain determinants for SNARE-mediated membrane fusion. *J. Cell Sci.* **123**, 2473–2480  
328 (2010).
- 329 26. Gordon, S. L., Leube, R. E. & Cousin, M. A. Synaptophysin is required for synaptobrevin  
330 retrieval during synaptic vesicle endocytosis. *J. Neurosci. Off. J. Soc. Neurosci.* **31**, 14032–  
331 14036 (2011).
- 332 27. Kwon, S. E. & Chapman, E. R. Synaptophysin regulates the kinetics of synaptic vesicle  
333 endocytosis in central neurons. *Neuron* **70**, 847–854 (2011).
- 334 28. Mitter, D. *et al.* The synaptophysin/synaptobrevin interaction critically depends on the  
335 cholesterol content. *J. Neurochem.* **84**, 35–42 (2003).
- 336 29. Jang, S.-S. & Chung, H. J. Emerging Link between Alzheimer’s Disease and Homeostatic  
337 Synaptic Plasticity. *Neural Plast.* **2016**, 7969272 (2016).
- 338 30. Pozueta, J., Lefort, R. & Shelanski, M. L. Synaptic changes in Alzheimer’s disease and its  
339 models. *Neuroscience* **251**, 51–65 (2013).
- 340 31. Mendez, M. F., Catanzaro, P., Doss, R. C., ARguello, R. & Frey, W. H. Seizures in  
341 Alzheimer’s disease: clinicopathologic study. *J. Geriatr. Psychiatry Neurol.* **7**, 230–233  
342 (1994).
- 343 32. Bernardi, S. *et al.* Seizures in Alzheimer’s disease: a retrospective study of a cohort of  
344 outpatients. *Epileptic Disord. Int. Epilepsy J. Videotape* **12**, 16–21 (2010).
- 345 33. Born, H. A. Seizures in Alzheimer’s disease. *Neuroscience* **286**, 251–263 (2015).
- 346 34. Eshkind, L. G. & Leube, R. E. Mice lacking synaptophysin reproduce and form typical  
347 synaptic vesicles. *Cell Tissue Res.* **282**, 423–433 (1995).
- 348 35. Beaudoin, G. M. J. *et al.* Culturing pyramidal neurons from the early postnatal mouse  
349 hippocampus and cortex. *Nat. Protoc.* **7**, 1741–1754 (2012).
- 350 36. Schneider, C. A., Rasband, W. S. & Eliceiri, K. W. NIH Image to ImageJ: 25 years of image  
351 analysis. *Nat. Methods* **9**, 671–675 (2012).
- 352 37. Iannuccelli, E. *et al.* NEMO: a tool for analyzing gene and chromosome territory  
353 distributions from 3D-FISH experiments. *Bioinforma. Oxf. Engl.* **26**, 696–697 (2010).
- 354 38. Leimer, U., Franke, W. W. & Leube, R. E. Synthesis of the mammalian synaptic vesicle  
355 protein synaptophysin in insect cells: a model for vesicle biogenesis. *Exp. Cell Res.* **224**, 88–  
356 95 (1996).
- 357 39. Hu, D., Serrano, F., Oury, T. D. & Klann, E. Aging-dependent alterations in synaptic  
358 plasticity and memory in mice that overexpress extracellular superoxide dismutase. *J.*  
359 *Neurosci. Off. J. Soc. Neurosci.* **26**, 3933–3941 (2006).
- 360 40. Tsokas, P., Ma, T., Iyengar, R., Landau, E. M. & Blitzer, R. D. Mitogen-activated protein  
361 kinase upregulates the dendritic translation machinery in long-term potentiation by  
362 controlling the mammalian target of rapamycin pathway. *J. Neurosci. Off. J. Soc. Neurosci.*  
363 **27**, 5885–5894 (2007).
- 364

365 **Acknowledgments:** We thank our colleagues at the University of Colorado for helpful  
366 comments and criticisms, Rudolf Leube for the *Syp*<sup>-/-</sup> mice, AmideBio for generous supply of  
367 BioPure™ amyloid peptides, Domenico Galati for help with analysis of FM unloading data,  
368 Mary S. Rosendahl and BiOptix for access to BiOptix SPR instrumentation, and Brooke Hirsch  
369 and Robert S. Hodges for access to the Biacore 3000. Paula Villar and Maryam Amini for  
370 assistance the seizure experiments and Ariann DeFazio for help with the purification of SYP.  
371 This work was supported in part by an NIH EUREKA award (M.H.B.S.), an HHMI CIA award  
372 (M.H.B.S.), a Corden Pharma Fellowship (D.J.A.) and a NIH (T32 GM065103)/CU Molecular  
373 Biophysics Predoctoral Traineeship (D.J.A.).

374 **Author contributions:** Experiments were conceived and designed by D.J.A. and M.H.B.S.  
375 Manuscript was written and edited by D.J.A. and M.H.B.S. Aβ42 binding column, VAMP2 co-  
376 immunoprecipitations, physin family analysis, primary neuronal culture and FM unloading  
377 experiments were performed and analyzed by D.J.A and M.H.B.S. Human SYP was expressed  
378 and purified by J.H.M. SPR experiments were performed and analyzed by S.P.E. and M.H.B.S.  
379 LTP experiments were performed by J.L. and analyzed by J.L., C.A.H. and M.H.B.S. Primary  
380 neuronal culture and electrophysiology was performed by C.S. and T.B. and analyzed by C.S.  
381 and M.H.B.S. Seizure susceptibility experiments were performed by L.H. and analyzed by L.H  
382 and M.H.B.S.

383 **Competing financial interests:** The University of Colorado has filed a patent related to SYP as  
384 a potential target for the treatment of AD.

385 **Materials & correspondence:** Correspondence and material requests should be addressed to  
386 MHBS (stowellm@colorado.edu).

## Figures:

**Figure 1 | A $\beta$ 42 inhibition of spontaneous and evoked transmission is SYP dependent. a,b,** Distribution of all kinetic time constants ( $\tau$ ) of FM dye unloading from WT (a) or *Syp*<sup>-/-</sup> (b) neurons treated with 15 nM A $\beta$ 42 (red) or scrambled peptide (blue). Insets show unloading curve from a representative single synapse with fit from bin indicated with arrow (WT + A $\beta$ 42,  $n=12,364$  synapses from 16 experiments; WT,  $n=22,996$  synapses from 15 experiments; *Syp*<sup>-/-</sup> + A $\beta$ 42,  $n=68,611$  synapses from 14 experiments; *Syp*<sup>-/-</sup>,  $n=75,274$  synapses from 11 experiments). c, Cumulative distribution functions of  $\tau$  for all 4 conditions. No significant differences between WT, *Syp*<sup>-/-</sup>, or *Syp*<sup>-/-</sup> + A $\beta$ 42. d, e, Averaged evoked EPSC traces (d) and average amplitudes (e) from WT neurons (blue,  $n=36$ ) and WT neurons treated with 500nM A $\beta$ 42 (red,  $n=38$ ). f, g, Averaged evoked EPSC traces (f) and average amplitudes (g) from *Syp*<sup>-/-</sup> neurons (blue,  $n=17$ ) and *Syp*<sup>-/-</sup> neurons treated with 500nM A $\beta$ 42 (red,  $n=13$ ). h, Representative mEPSC traces from primary WT and *Syp*<sup>-/-</sup> neurons treated  $\pm$  500nM A $\beta$ 42 with representative spike waveform. i, j, Average mEPSC amplitudes (i) and frequencies (j) of neurons from WT ( $n=19$ ), WT treated with 500nM A $\beta$ 42 ( $n=28$ ), *Syp*<sup>-/-</sup> ( $n=18$ ) and *Syp*<sup>-/-</sup> treated with 500 nM A $\beta$ 42 ( $n=19$ ). \*\*\*\* $P < 0.0001$  (Kolmogorov-Smirnov test) (c), \* $P < 0.01$ , \*\*\*\* $P < 0.0001$  (unpaired t-test) (e, g, i, j). Data are mean  $\pm$  s.e.m.

a

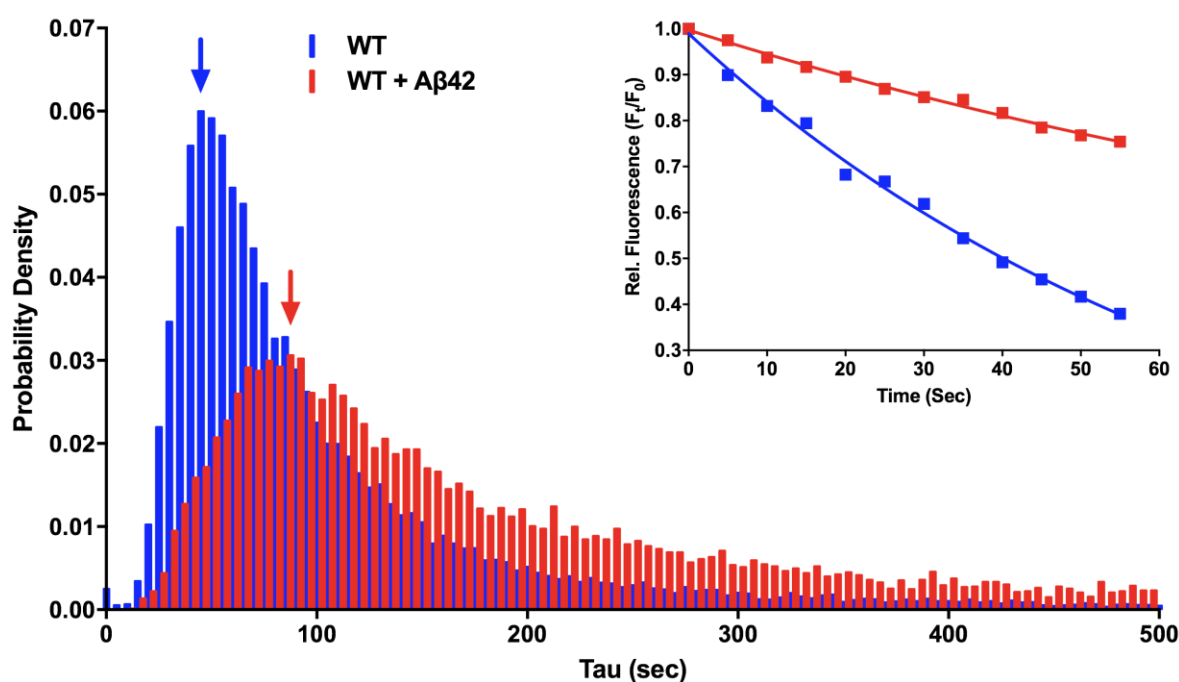

b

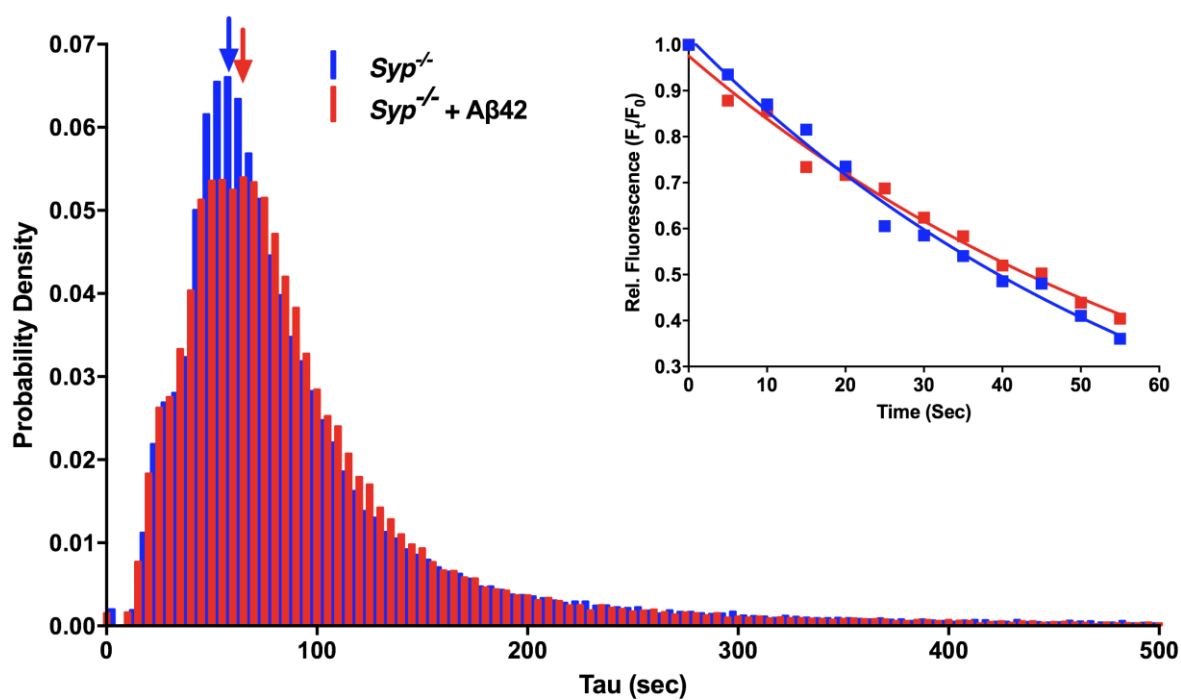

c

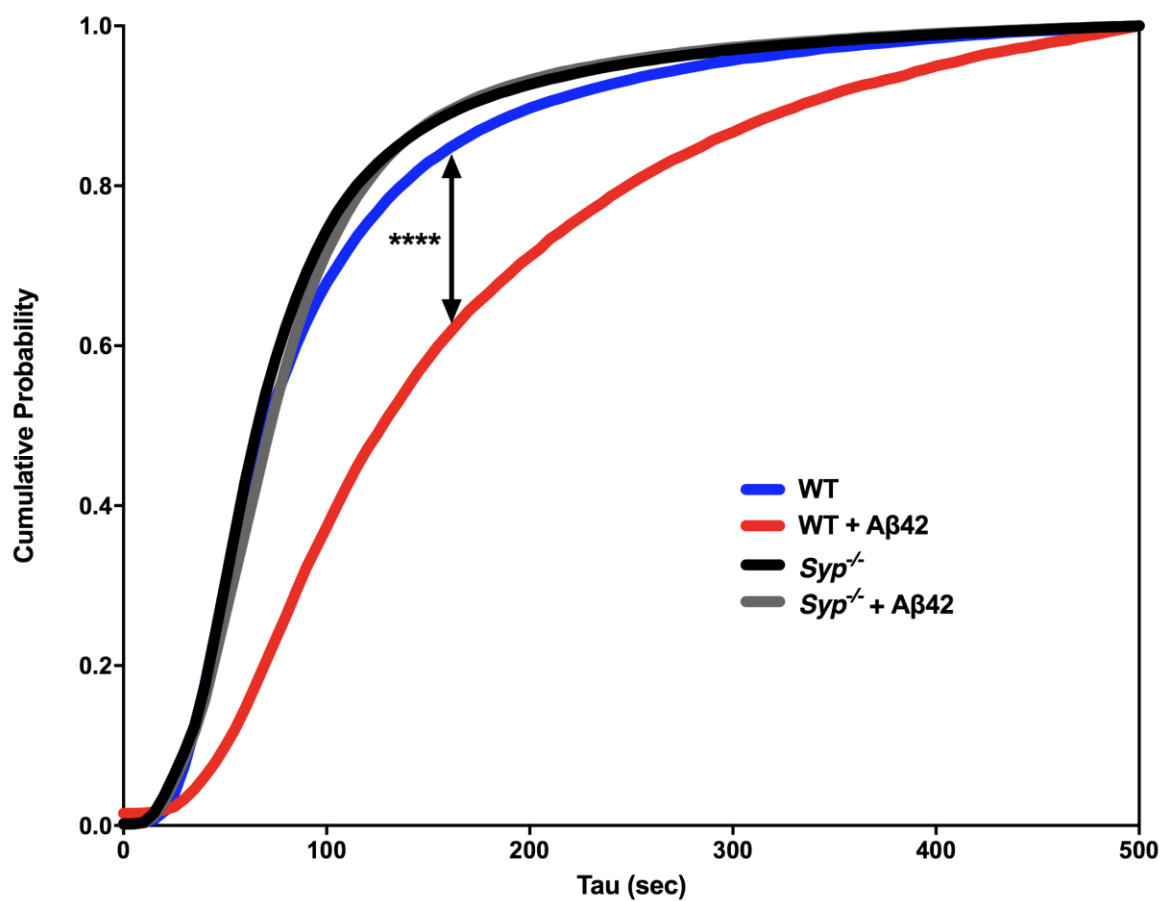

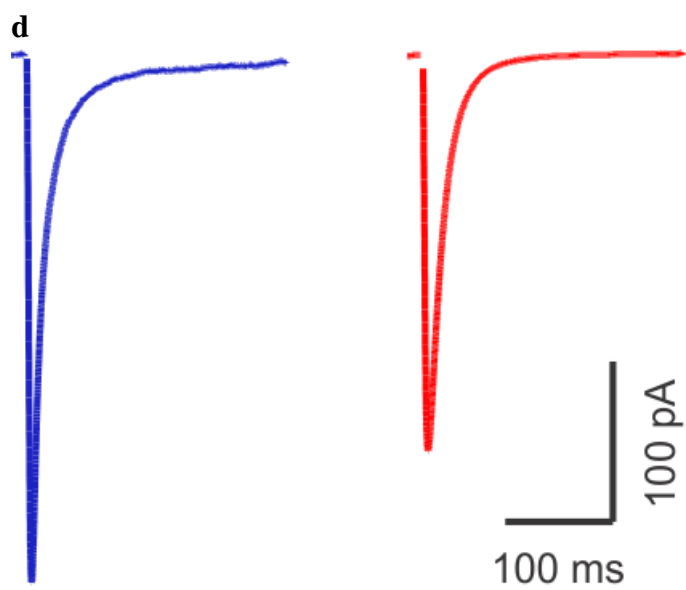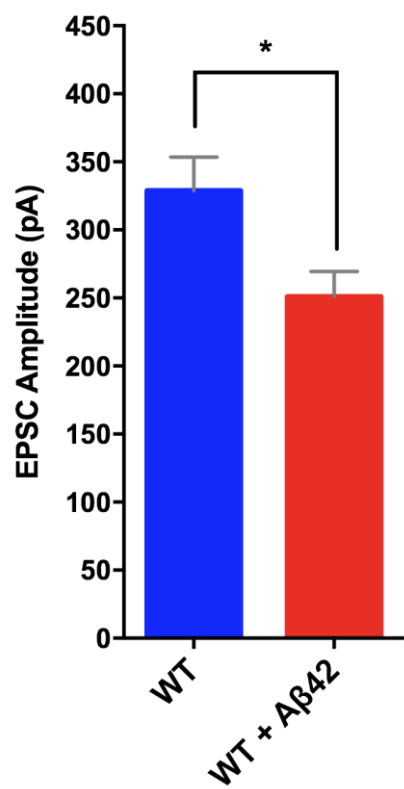

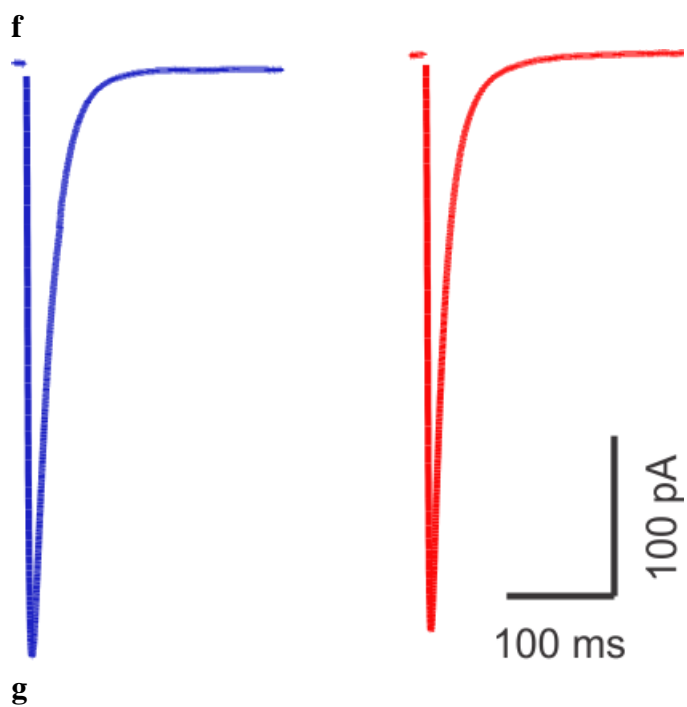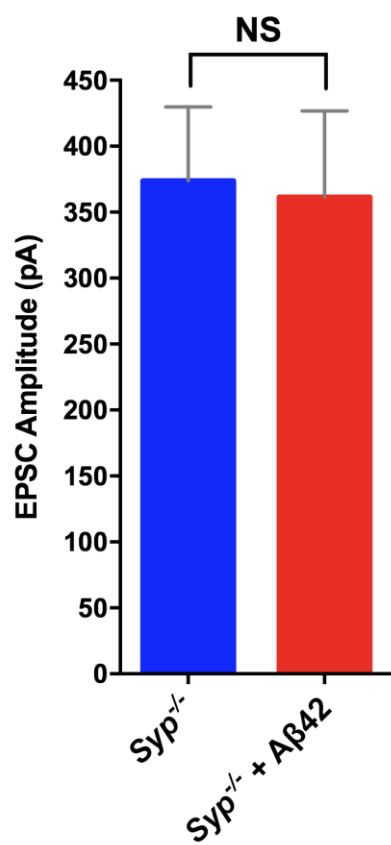

**h**

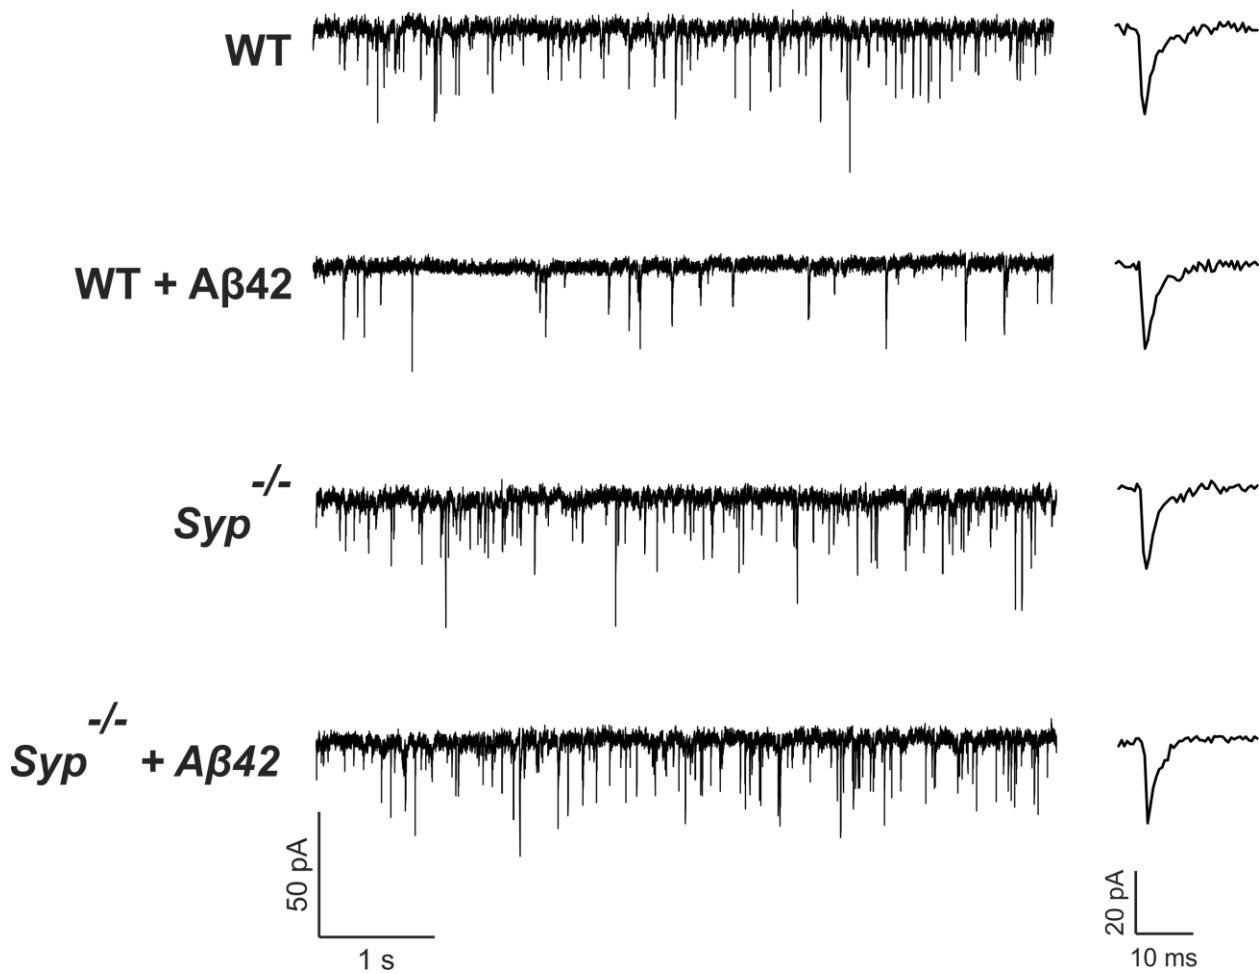



i

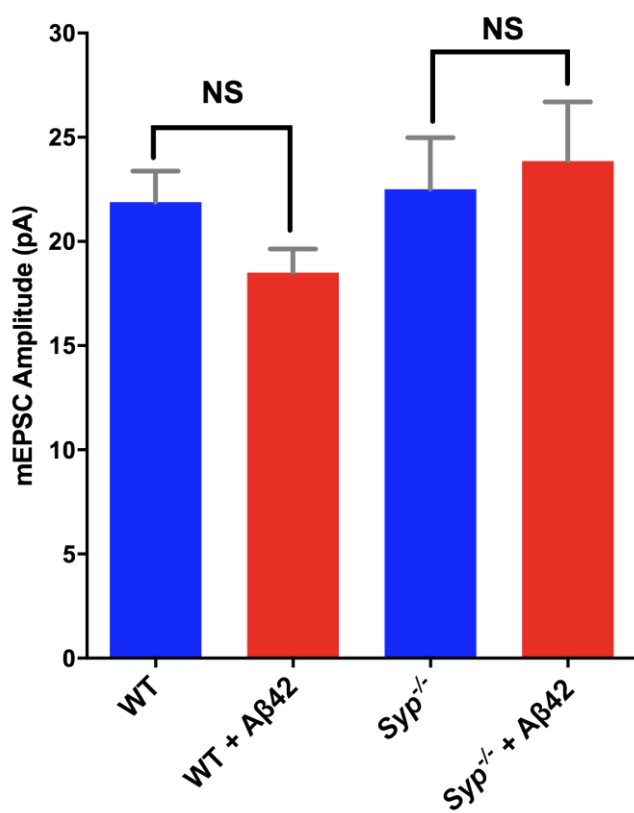

j

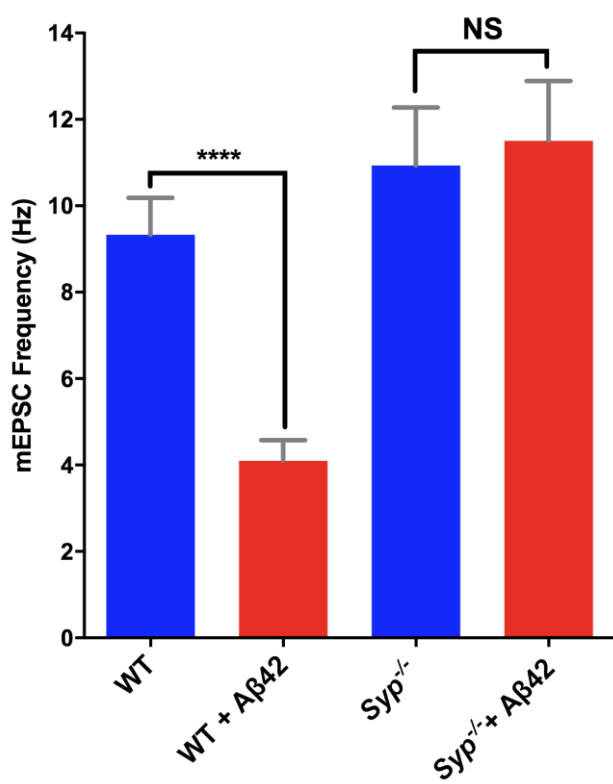

**Figure 2 | A $\beta$ 42 disrupts the SYP/VAMP2 complex via high affinity interaction.** **a**, SPR sensorgrams for binding of recombinant human SYP at several concentrations and BSA to A $\beta$ 42; SYP at 7nM binding to reverse A $\beta$ 42 (A $\beta$ 42-1) in gray. On-rate = 835,507 M<sup>-1</sup> sec<sup>-1</sup>, off-rate = 0.003746 sec<sup>-1</sup>, calculated  $K_d$  for the SYP hexamer = 750 picomolar. **b**, **c**, Cortical neurons treated with 15 nM A $\beta$ 42 or scrambled peptide for 24 hrs. were lysed and immunoprecipitated for SYP or VAMP2 and probed for the other protein. Representative blot (**b**) and quantification from multiple experiments (**c**) (SYP IP  $n=3$ , VAMP IP  $n=2$ ). **d**, Protein levels of SYP paralogs SYNPR and SYNGR1 in *Syp*<sup>-/-</sup> synaptosomal extracts were quantified by immunoblotting ( $n=2$ ) normalized to MAP2 and shown as fold change from protein levels in WT. **e**, *Syp*<sup>-/-</sup> whole brain synaptosomes were immunoprecipitated for VAMP2 and immunoblotted for SYNPR and SYNGR1. *Syp*<sup>-/-</sup> input and WT synaptosomes shown for comparison. **f**, Immunoblot analysis of synaptic proteins bound to column-immobilized A $\beta$ 42 or scrambled peptide. MAP2 is used as a loading control. \*\*\* $P < 0.001$  (t test) (c). Data are mean  $\pm$  s.e.m.

**a**

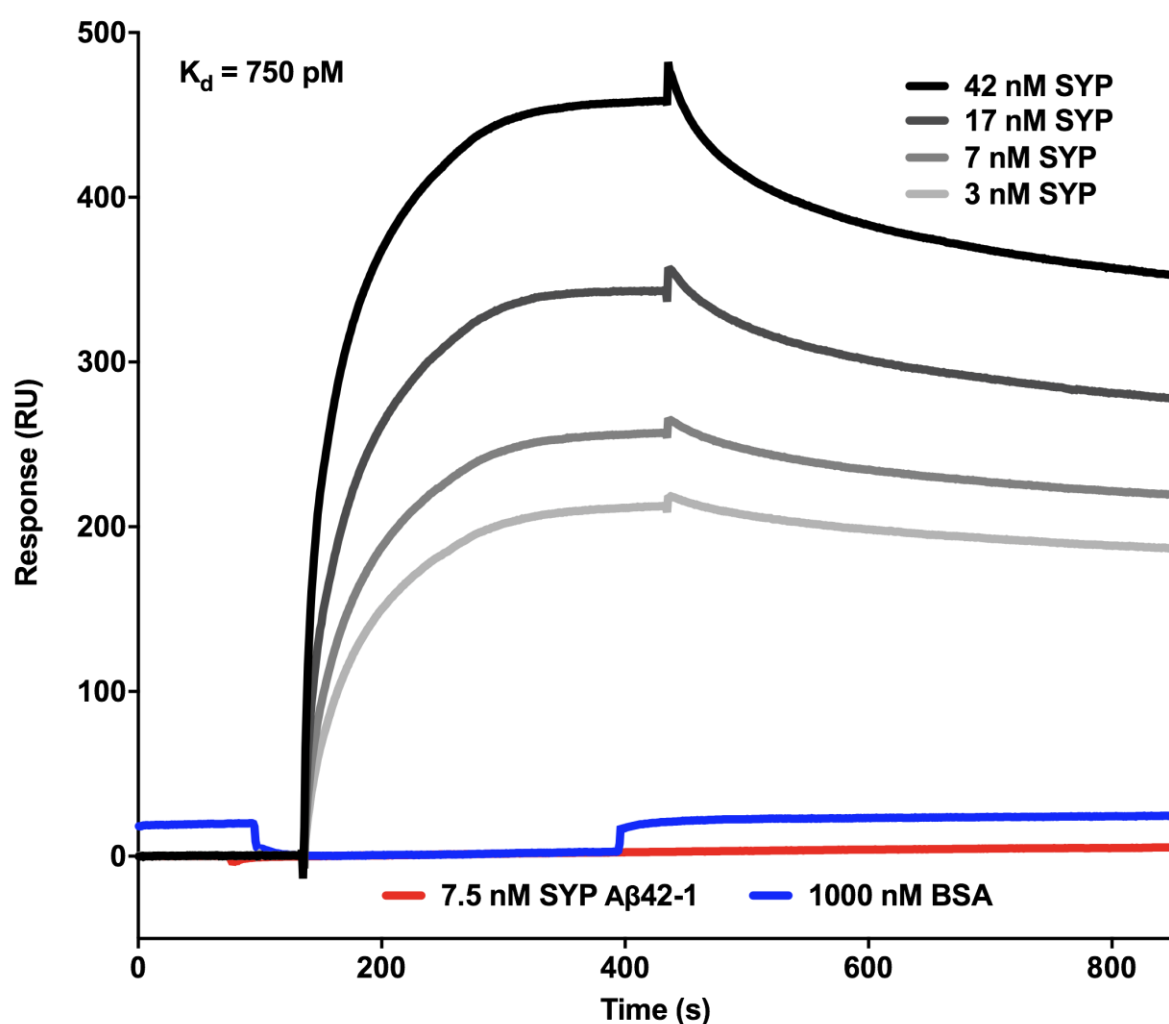

**b**

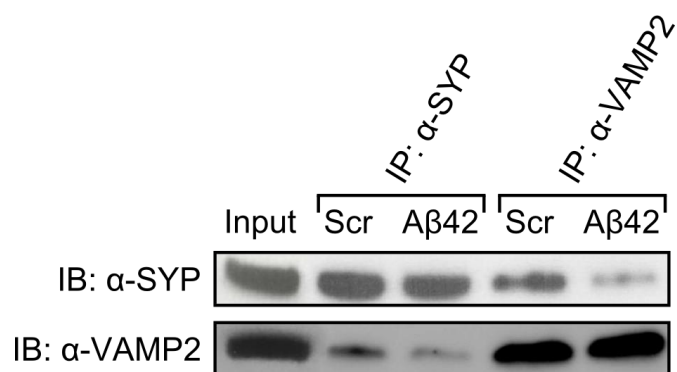

**c**

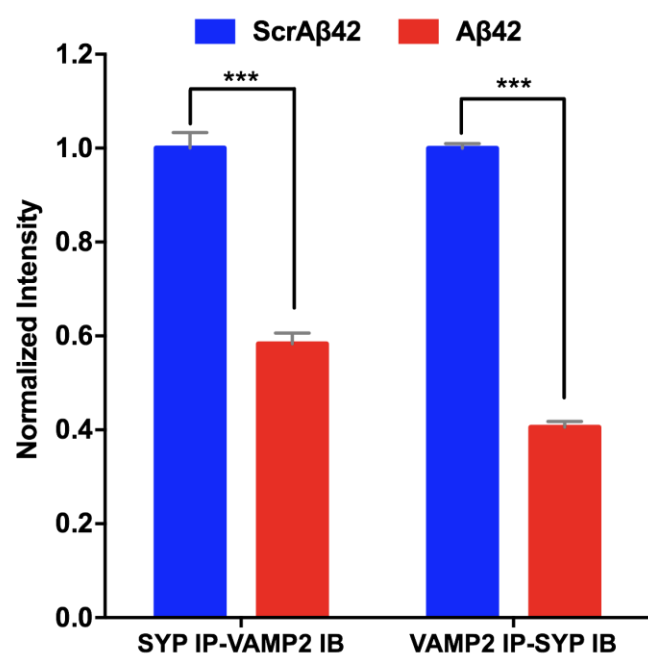

d

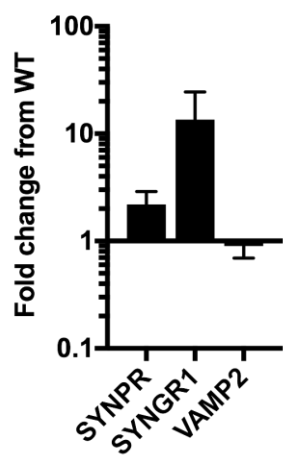

e

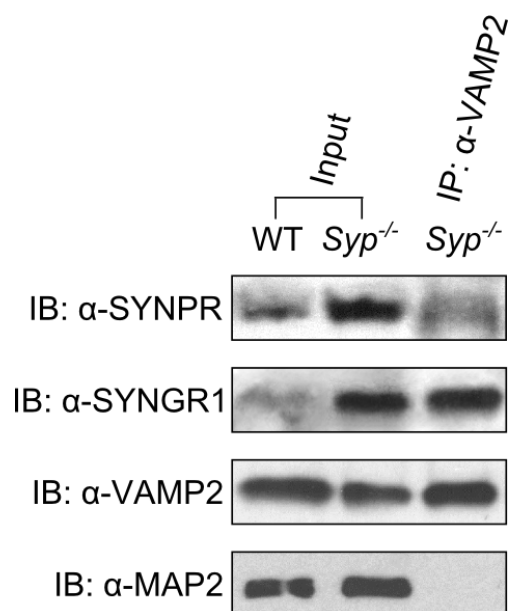

**Figure 3 | Loss of SYP/VAMP2 links AD seizures, A $\beta$ 42 inhibition of LTP and Alzheimer's genotypes.** **a, b, c, d**, Following 4 hour treatment of hippocampal slices with A $\beta$ 42 or control, EPSPs were measured before and after high frequency stimulation. LTP induction in WT (**a, b**, blue,  $n=16$ ) was blocked by treatment with A $\beta$ 42 (**a, b**, red,  $n=16$ ) whereas normal LTP in *Syp*<sup>-/-</sup> (**c, d**, blue,  $n=13$ ) was unperturbed in *Syp*<sup>-/-</sup> slices treated with A $\beta$ 42 (**c, d**, red,  $n=11$ ). **e, f**, Mice 4-6 months old of 4 genotypes (WT ( $n=9$ ), *Syp*<sup>-/-</sup> ( $n=5$ ), TgAD ( $n=6$ ), *ApoE4* ( $n=9$ )) were injected with kainic acid (25mg/Kg i.p.) and observed for 60 minutes with video recording. Seizure severity was scored blind by two observers using a modified Racine scale. Latency survival to R6 (**e**) or R8 (**f**) seizure severity are reported. **g**, The strongest AD-associated genotypes lead to increased A $\beta$ 42 (*APP* and *PSEN1-2* alleles) which disrupts the pre-fusion vSNARE complex of SYP (blue) and VAMP2 (homodimer in red) resulting in redistribution of VAMP2 on the SV membrane, subsequent reduction of release probability and dysregulated plasticity. These synaptic defects may underlie disease phenotypes such as seizures and loss of memory and cognition making the SYP/VAMP2 complex a key early target in the disease progression. \*\*\*\* $p < 0.0001$  (unpaired t test with Welch's correction) (**a, b, c, d**). \* $p < 0.05$ , \*\* $p < 0.005$ , \*\*\* $p < 0.0005$  (Gehan-Breslow-Wilcoxon test) (**e, f**). Data are mean  $\pm$  s.e.m.

**a**

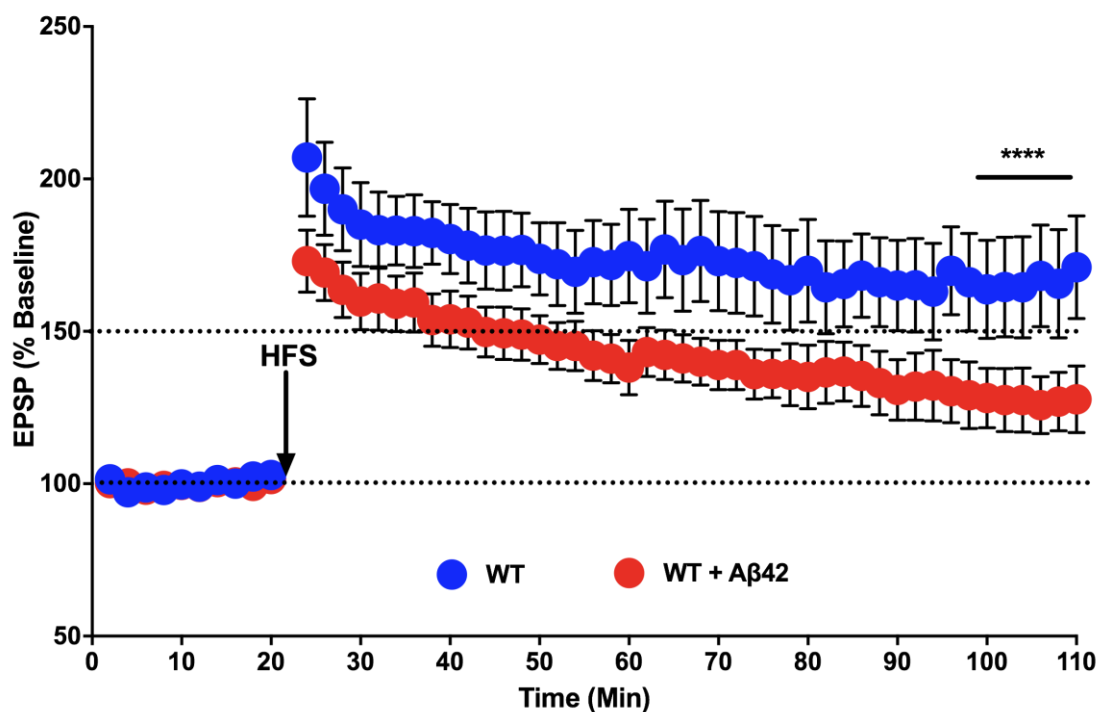

b

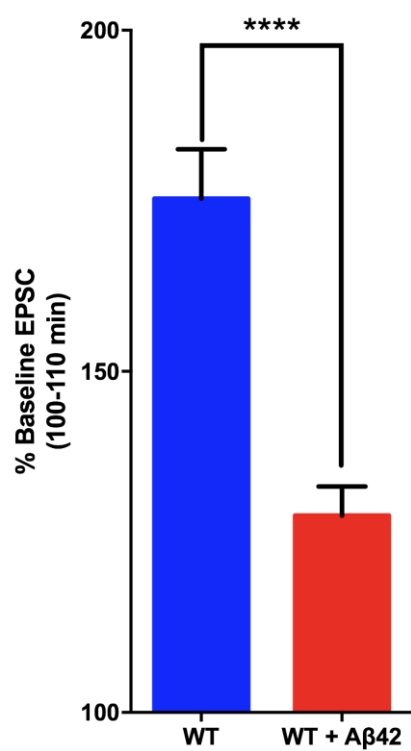

c

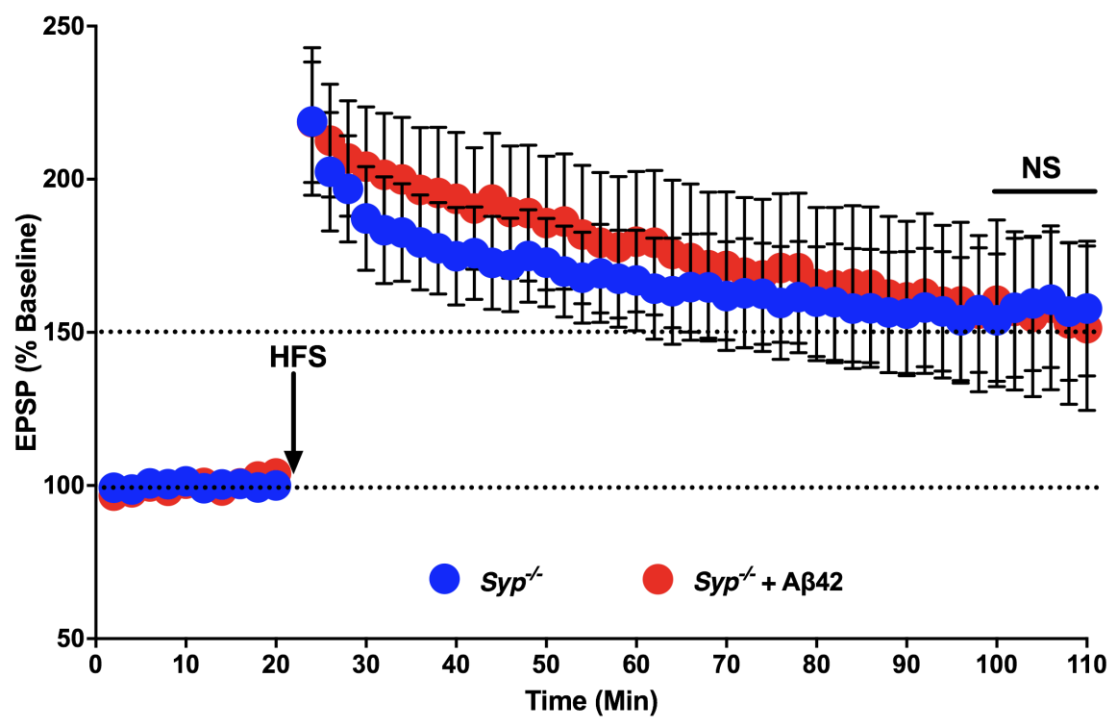

d

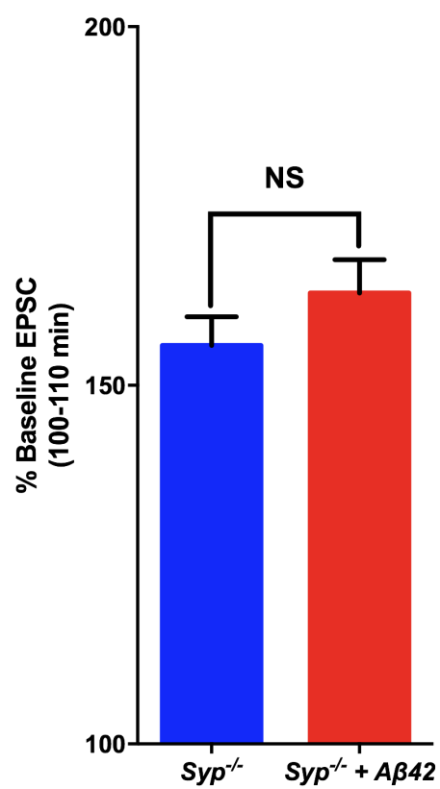

e

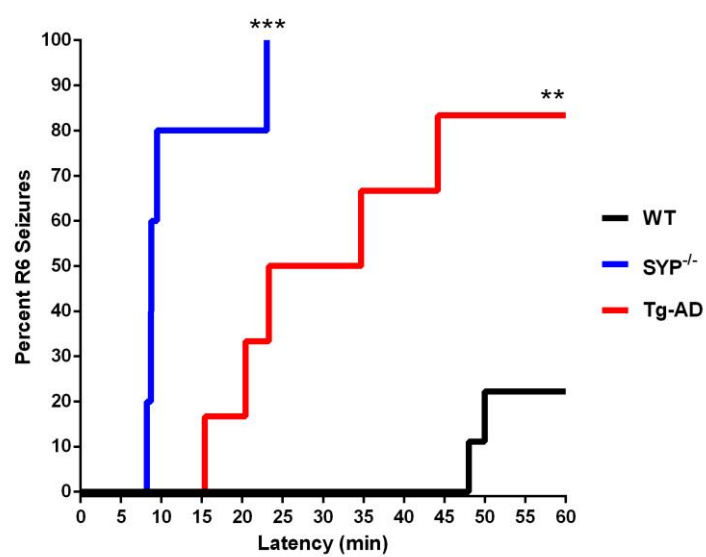

f

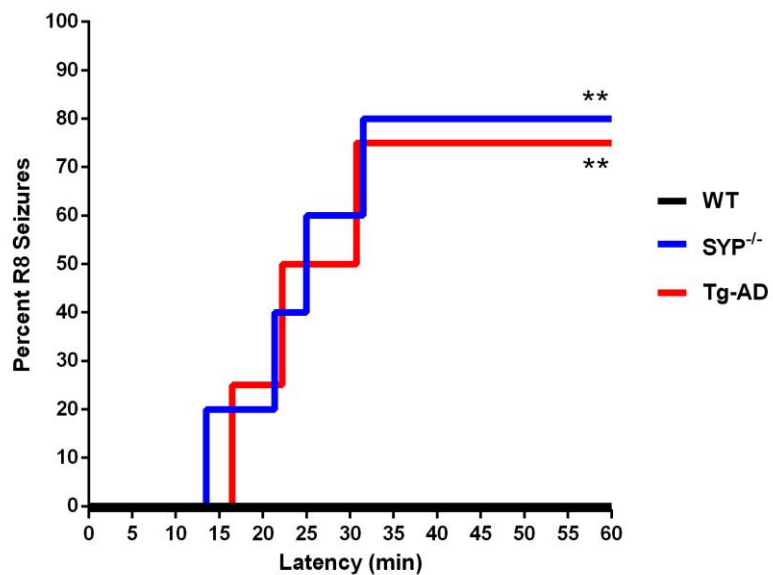

g

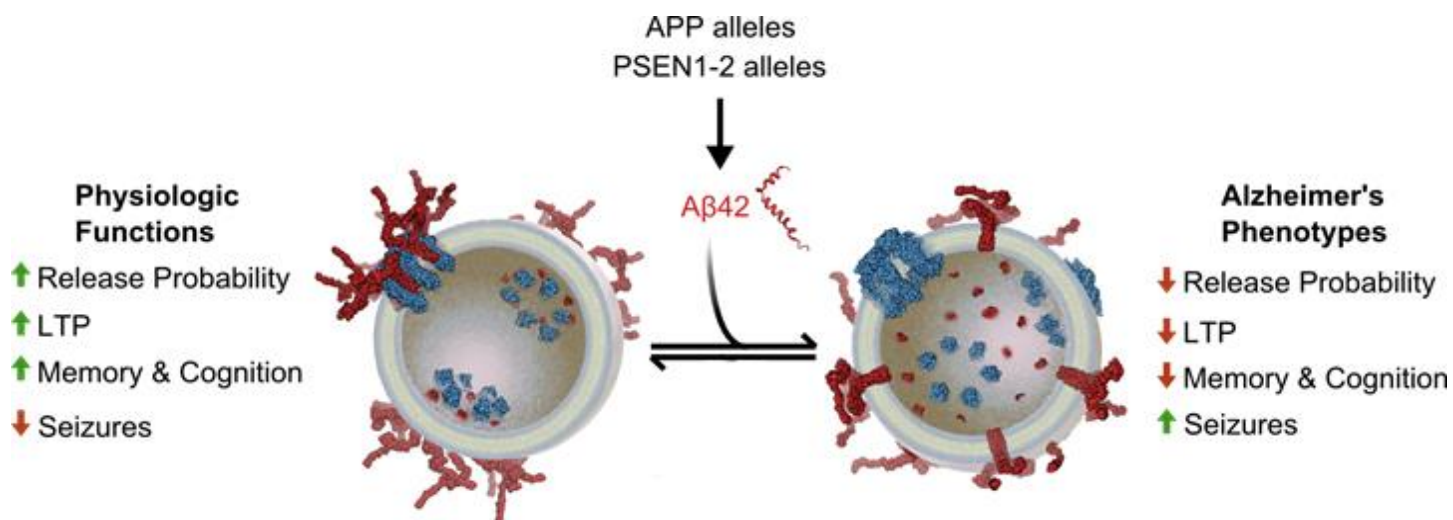



## Extended data:

**Extended Data Figure 1 | Predominantly soluble oligomers and monomeric/dimeric A $\beta$ 42 used for neuron treatment and binding studies.** Recombinant A $\beta$ 42 peptide was prepared fresh for each experiment from lyophilized film by first dissolving into 10 mM NaOH under sonication and then diluting in culture media. Prepared peptide was incubated for 10 minutes under experimental conditions prior to aggregation analysis. **a**, 100, 250 or 500 ng of peptide was assayed by native PAGE and silver staining to determine aggregation state. Molecular weight markers are in kDa and a line-scan plot of the 500 ng lane is shown at right. **b**, Line-scan data from multiple replicates ( $n=3$ ) was used to estimate the relative levels of various peptide species present in the sample. **c**, Representative electron micrograph of negative stained peptide sample at 28K magnification confirms that the predominant forms observed under these conditions include small oligomers ranging from 5 to 8 nm in diameter (corresponding to the ~200 kDa band in **a**), monomers, dimers and trimers (corresponding to the ~5, 10 and 15 kDa bands in **a**) which are too small to be observed under these conditions. Scale bar = 100 nm. Data are mean  $\pm$  s.e.m.

**a**

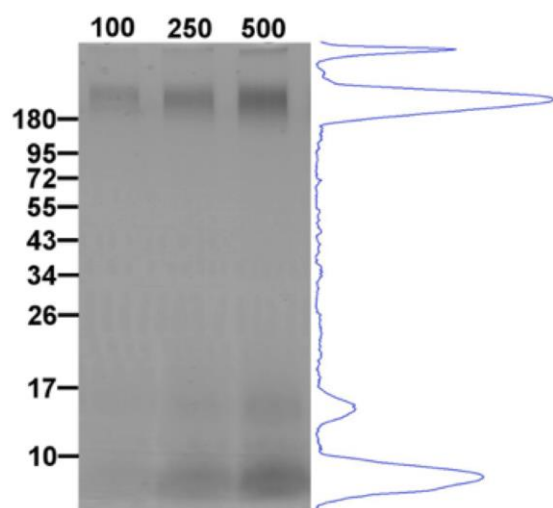

**b**

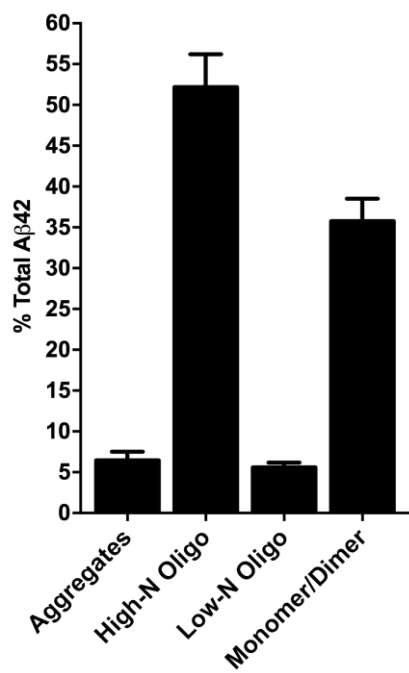

**c**

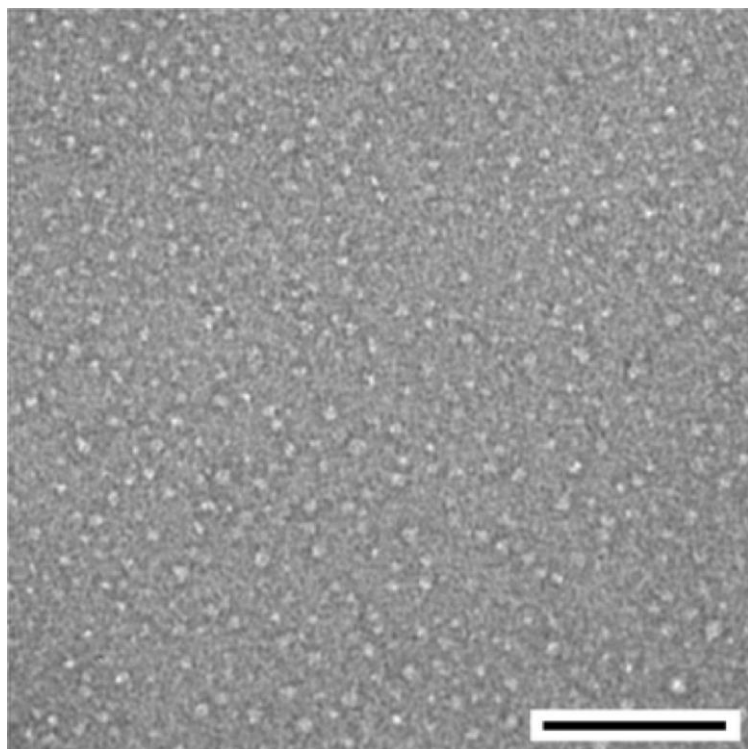

**Extended Data Figure 2 | FM Photobleaching rate is low relative to FM unloading rate.** Relative fluorescence intensity of synaptic puncta and non-synaptic staining averaged across experiments shown in Fig. 1a during unloading. Non-synaptic background staining decays at photobleaching rate ( $\tau=436s$ ).

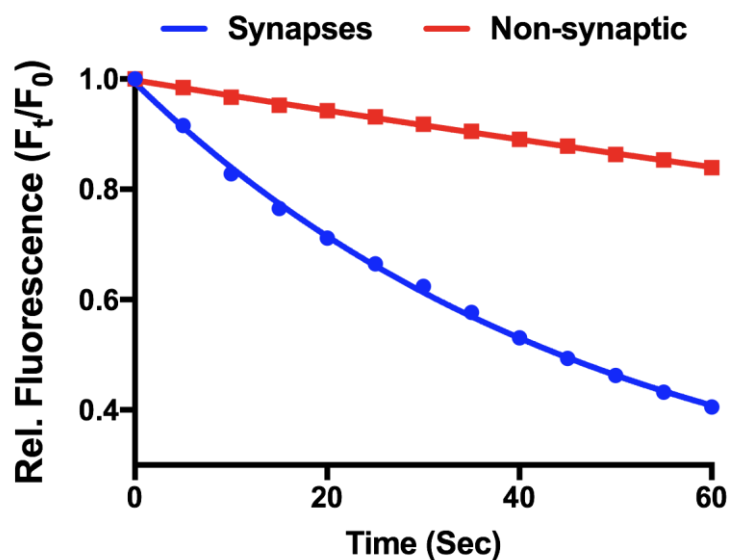

**Extended Data Figure 3 | A $\beta$ 42 on SPR chip is predominantly monomeric/dimeric and soluble oligomers.** Antibodies with well characterized specificity for monomeric/dimeric (6E10), soluble oligomeric (NBP1) or protofibrillar (4G8) A $\beta$ 42 were used as analytes in an SPR experiment with A $\beta$ 42 prepared as described in Methods as ligand. Orange trace shows SYP binding for comparison. Grey traces show no binding to reverse A $\beta$ 42 peptide by any antibody confirming specificity.

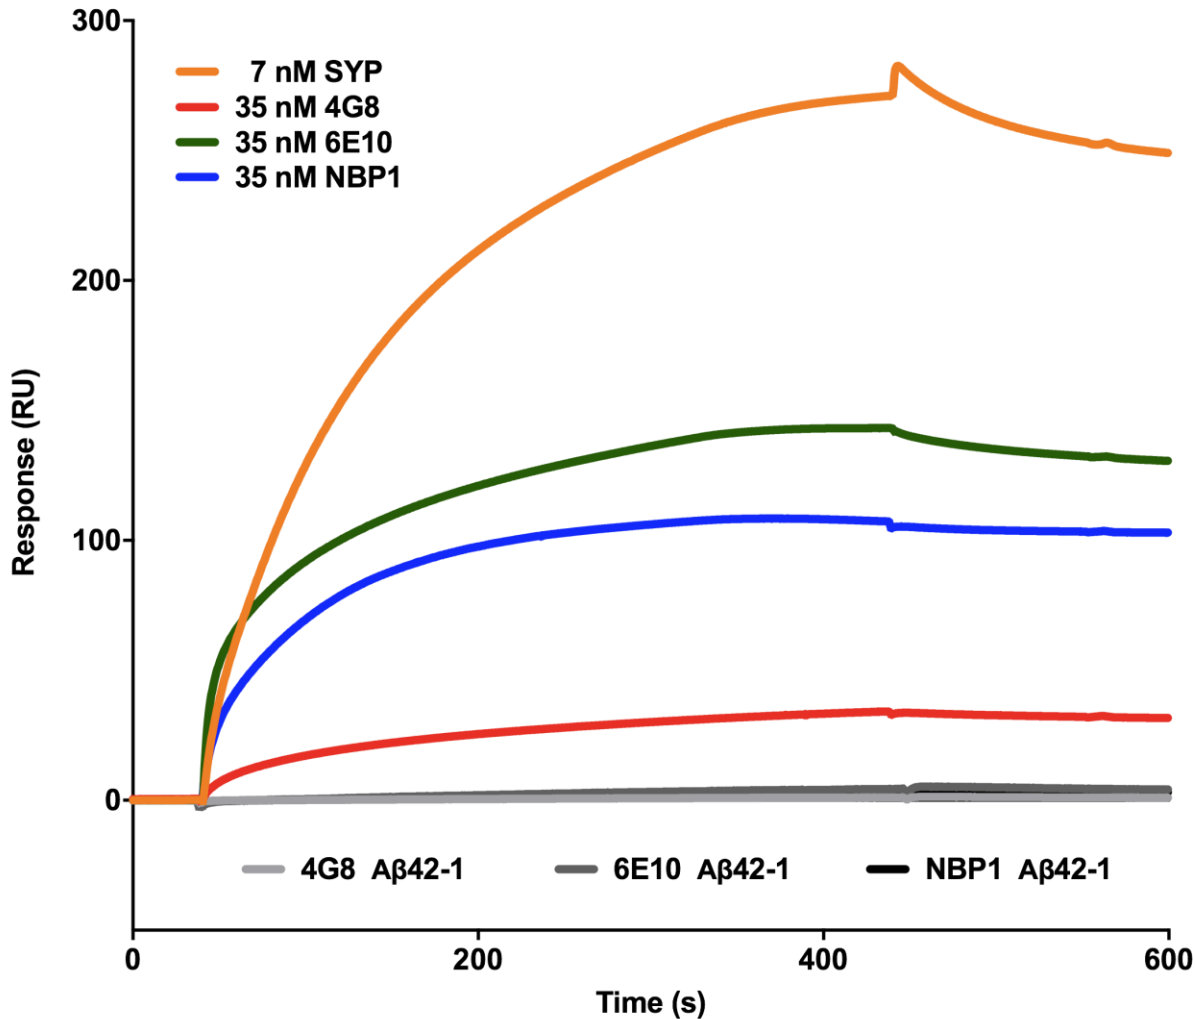

**Extended Data Figure 4 | SYP Paralogs most highly conserved in the transmembrane domains. a,** PhyML tree for SYP and all 6 neuronal paralogs, % identity to SYP indicated in parentheses. Paralogs studied in Fig. 2 are highlighted in orange. **b,** Conservation score of physin family alignment (red) overlaid with SYP hydropathy score by the Kyte & Doolittle method (blue). TMDs indicated by green boxes.

**a**

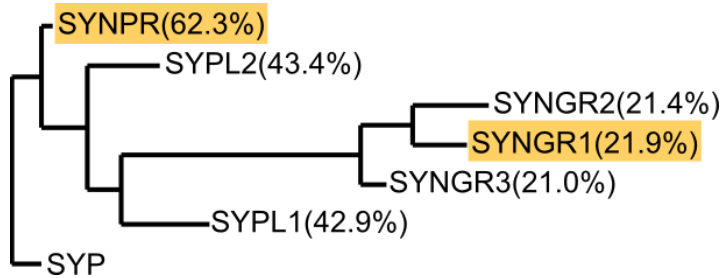

**b**

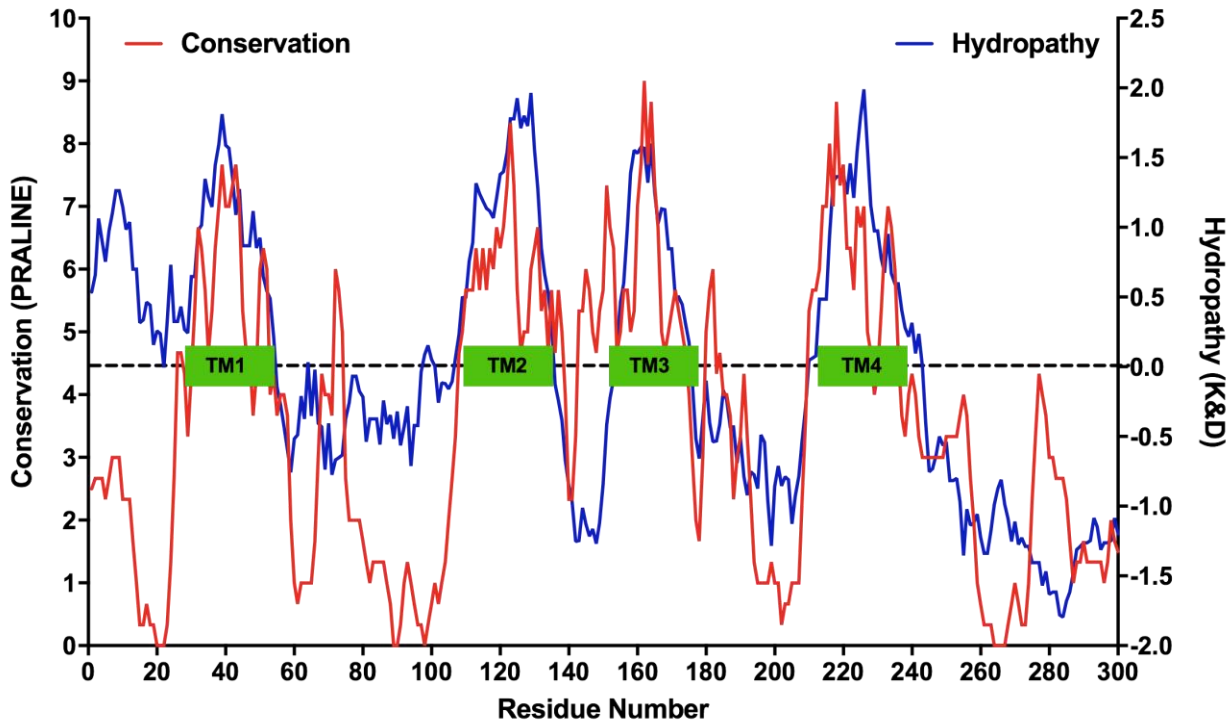

**Extended Data Figure 5 | Basal neurotransmission is normal in *Syp*<sup>-/-</sup> slices.** Wild type and *Syp*<sup>-/-</sup> mice show similar input/output ratios demonstrating no difference in the basal neurotransmission between WT and *Syp*<sup>-/-</sup>. Data are mean  $\pm$  s.e.m.

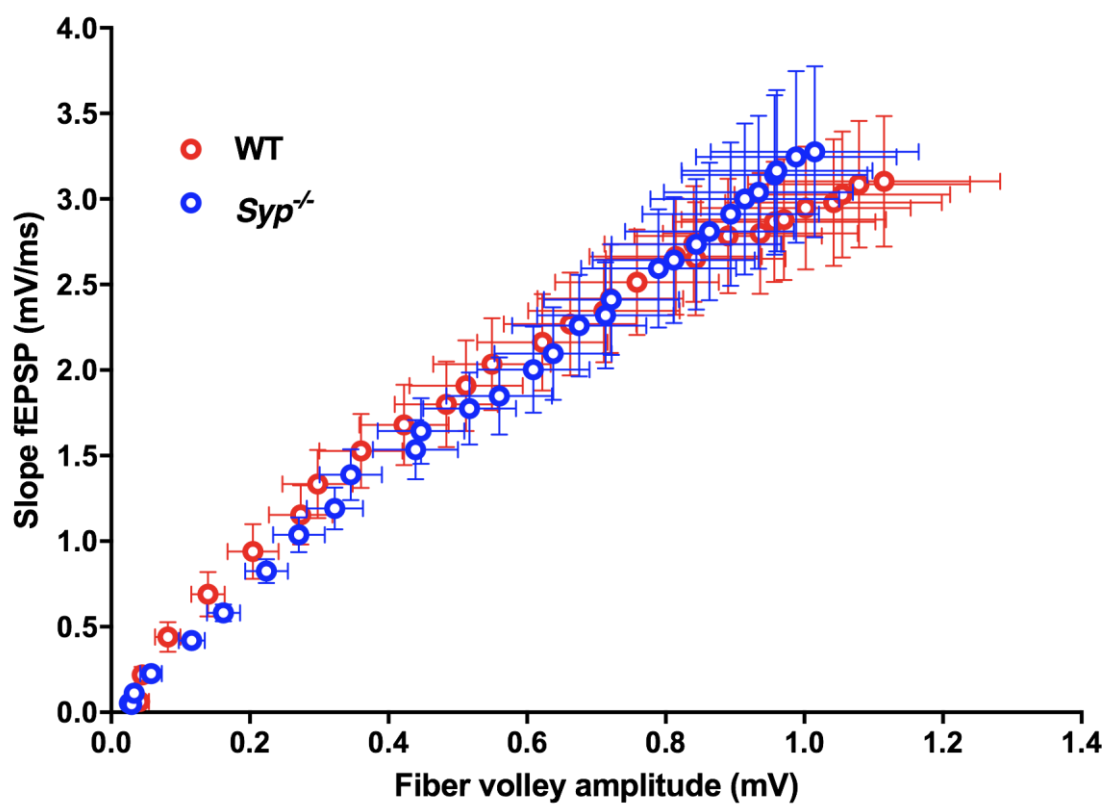

**Extended Data Figure 6 | TgAD mice accumulate A $\beta$ 42 in brains from 3 months on.** Total brain levels of A $\beta$ 42 quantified by ELISA from WT and Tg-AD mice at 3, 6 and 9 months of age ( $n=4$  for all groups). Data are mean  $\pm$  s.e.m.

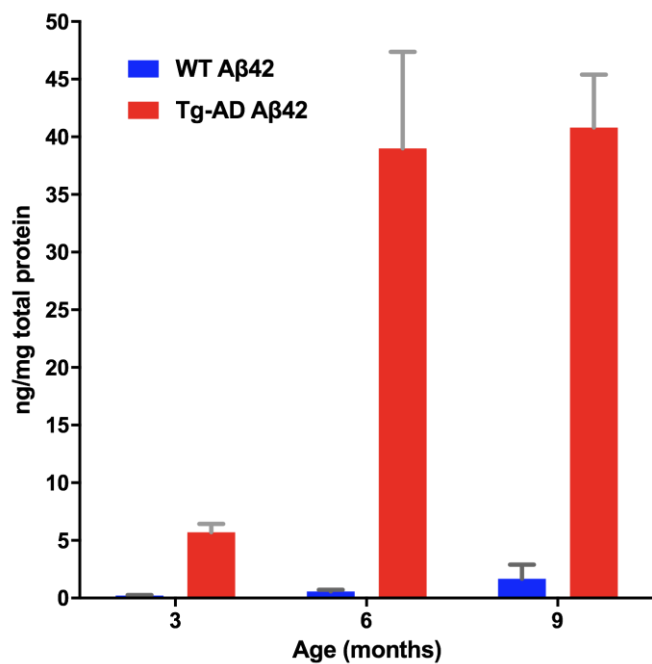

Source: http://www.biorxiv.org/content/10.1101/129551v1.full.pdf
